# Supplementary material
Source: PubMed Central journal article supplement (PMC3703852)
Supplement: NIHMS449172-supplement-eTable1_and_figure_legends.pdf [file NIHMS449172-supplement-eTable1_and_figure_legends.pdf]

eTable 1.

**Correlations between Sampling Sites**

|        | P1-P-N <sub>1</sub><br>(2.8%)<br>6/214 | P1-P-T<br>(2.8%)<br>6/214 | P1-P-S<br>(2.9%)<br>6/205 | C-P-N<br>(9.8%)<br>21/214 | C-P-T<br>(6.5%)<br>14/214 | C-P-S<br>(6.8%)<br>14/205 | C-AC-N<br>(51.8%)<br>113/218 | C-AC-T<br>(17.1%)<br>37/217 |
|--------|----------------------------------------|---------------------------|---------------------------|---------------------------|---------------------------|---------------------------|------------------------------|-----------------------------|
| P1-P-N | <b>1.000</b>                           | <b>.143*</b>              | <b>.142*</b>              | <b>.420**</b>             | <b>.070</b>               | <b>.182**</b>             | <b>.049</b>                  | <b>-.075</b>                |
|        |                                        | 1 (0.5%)                  | 1 (0.5%)                  | 5 (2.3%)                  | 1 (0.5%)                  | 2 (1.0%)                  | 4 (1.9%)                     | 0 (0.0%)                    |
| P1-P-T |                                        | <b>1.000</b>              | <b>-.030</b>              | <b>.325**</b>             | <b>.299**</b>             | <b>.068</b>               | <b>.105</b>                  | <b>-.075</b>                |
|        |                                        |                           | 0 (0.0%)                  | 4 (1.9%)                  | 3 (1.4%)                  | 1 (0.5%)                  | 5 (2.3%)                     | 0 (0.0%)                    |
| P1-P-S |                                        |                           | <b>1.000</b>              | <b>.419**</b>             | <b>.182**</b>             | <b>.297**</b>             | <b>.112</b>                  | <b>-.078</b>                |
|        |                                        |                           |                           | 5 (2.4%)                  | 2 (1.0%)                  | 3 (1.5%)                  | 5 (2.4%)                     | 0 (0.0%)                    |
| C-P-N  |                                        |                           |                           | <b>1.000</b>              | <b>.294**</b>             | <b>.419**</b>             | <b>.095</b>                  | <b>.023</b>                 |
|        |                                        |                           |                           |                           | 6 (2.8%)                  | 8 (3.9%)                  | 14 (6.5%)                    | 4 (1.9%)                    |
| C-P-T  |                                        |                           |                           |                           | <b>1.000</b>              | <b>.310**</b>             | <b>.139*</b>                 | <b>.036</b>                 |
|        |                                        |                           |                           |                           |                           | 5 (2.4%)                  | 11 (5.1%)                    | 3 (1.4%)                    |
| C-P-S  |                                        |                           |                           |                           |                           | <b>1.000</b>              | <b>-.045</b>                 | <b>-.017</b>                |
|        |                                        |                           |                           |                           |                           |                           | 6 (2.9%)                     | 2 (1.0%)                    |
| C-AC-N |                                        |                           |                           |                           |                           |                           | <b>1.000</b>                 | <b>.267**</b>               |
|        |                                        |                           |                           |                           |                           |                           |                              | 30<br>(13.8%)               |

<sub>1</sub> Heading numbers indicate percent positive in parentheses and number positive/number tested on the second line below. Within the table, numbers in bold list the correlation coefficients, and second line below indicates the number positive (% positive) for both tests. Headers indicate: target for assay- type of assay – site.

Abbreviations: antigen capture (AC), CARDS Tx (C), nasopharyngeal (N), P1 adhesin (P1), polymerase chain reaction (P), serum (S), throat (T)

\*  $P < .05$  level (2-tailed), \*\*  $P < 0.01$  level (2-tailed).

**eFigure 1. Exhaled Breath Condensate pH by Mp status**

EBC pH by group and Mp status (neg=negative, pos=positive). Solid bars: interquartile range (IQR) 25<sup>th</sup>- 75<sup>th</sup> percentile; central line: medians; whiskers: highest (lowest) value within 1.5 IQR from end of boxes; circles and asterisks: outliers. † Mp pos vs Mp neg (refractory group),  $P=.007$

**eFigure 2. Quality of Life in Refractory Asthma**

PAQLQ scores in refractory asthma group according to Mp status (neg=negative, pos=positive). Horizontal lines indicate means for each group. \*Mp pos vs Mp neg,  $P=.03$
