# Supplementary material
Source: PubMed Central journal article supplement (PMC3703852)

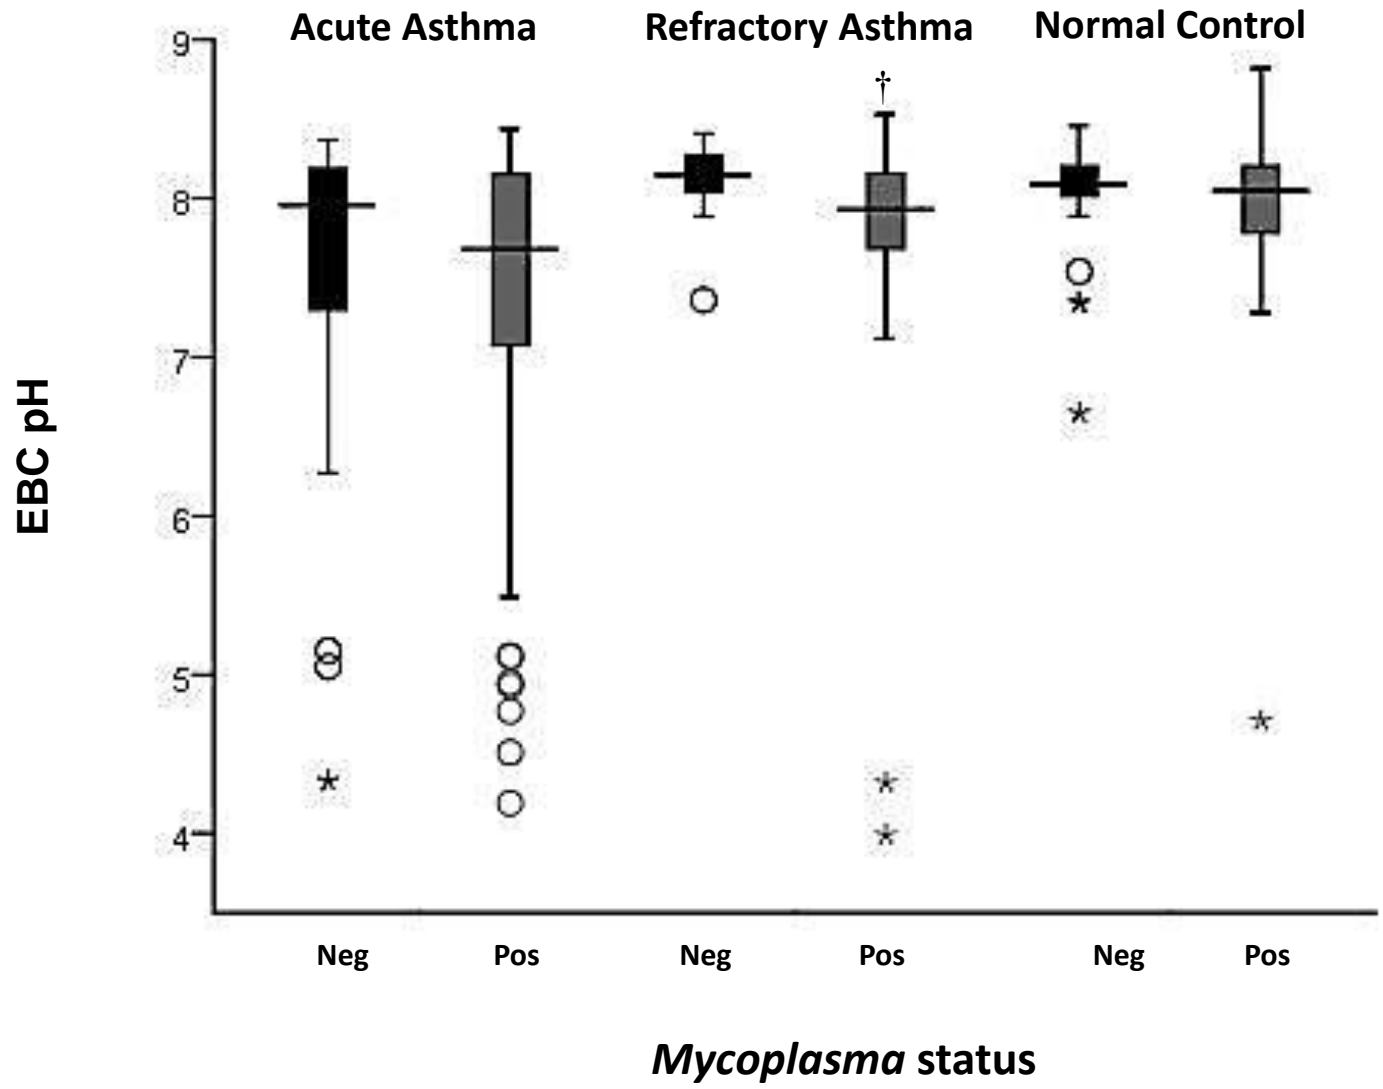

Supplement: NIHMS449172-supplement-eFigure_1.pdf [file NIHMS449172-supplement-eFigure_1.pdf]
